# Supplementary material for: High-intensity interval training may reduce depressive symptoms in individuals with schizophrenia, putatively through improved VO2max: A randomized controlled trial
Source: PubMed Central journal article supplement (PMC9394183; doi:10.3389/fpsyt.2022.921689), 2022-08-04
Supplement: Table_1.pdf [file Table_1.pdf]

**Table S1** Efficiency analyses, mixed effects models, intention-to-treat: The main models that were tested for each factor, taking non-significant factors out of the model until the best fit models in bold.

| Symptoms                     | Model 1                      |               |              |       | Model 2                                           |                     |                     |              | Model 3                                                                           |                    |                   |   |
|------------------------------|------------------------------|---------------|--------------|-------|---------------------------------------------------|---------------------|---------------------|--------------|-----------------------------------------------------------------------------------|--------------------|-------------------|---|
|                              | Effects                      | Estimate (SE) | 95%CI        | p     | Effects                                           | Estimate (SE)       | 95%CI               | p            | Effects                                                                           | Estimate (SE)      | 95%CI             | p |
| Overall                      | Baseline                     | 36.32 (1.82)  | 32.75,39.89  |       | <b>Baseline</b>                                   | <b>36.32 (1.82)</b> | <b>32.76, 39.89</b> |              |                                                                                   |                    |                   |   |
|                              | Time post-intervention       | -3.15 (1.87)  | -6.82, 0.52  | 0.093 | <b>Time post-intervention (both groups)</b>       | <b>-3.29 (1.39)</b> | <b>-6.01, -0.58</b> | <b>0.018</b> |                                                                                   |                    |                   |   |
|                              | Time follow-up               | -3.86 (2.07)  | -7.91, 0.20  | 0.062 | <b>Time follow-up</b>                             | <b>-4.16 (1.52)</b> | <b>-7.14, -1.18</b> | <b>0.006</b> |                                                                                   |                    |                   |   |
|                              | Groupxtime post-intervention | -0.30 (2.61)  | -5.42, 4.82  | 0.909 | -                                                 |                     |                     |              |                                                                                   |                    |                   |   |
|                              | Groupxtime follow-up         | -0.62 (2.90)  | -6.29, 5.05  | 0.831 | -                                                 |                     |                     |              |                                                                                   |                    |                   |   |
| Positive factor <sup>†</sup> | Baseline                     | 5.64 (0.45)   | 4.76, 6.52   |       | <b>Baseline</b>                                   | <b>5.64 (0.45)</b>  | <b>4.76, 6.52</b>   |              |                                                                                   |                    |                   |   |
|                              | Time post-intervention       | -0.80 (0.47)  | -1.72, 0.12  | 0.088 | <b>Time post-intervention (both groups)</b>       | <b>-0.51 (0.35)</b> | <b>-1.20, 0.19</b>  | <b>0.153</b> |                                                                                   |                    |                   |   |
|                              | Time follow-up               | -1.05 (0.53)  | -2.08, -0.02 | 0.046 | <b>Time follow-up (both groups) (both groups)</b> | <b>-1.09 (0.39)</b> | <b>-1.85, -0.34</b> | <b>0.005</b> |                                                                                   |                    |                   |   |
|                              | Groupxtime post-intervention | 0.63 (0.66)   | -0.67, 1.93  | 0.340 | -                                                 |                     |                     |              |                                                                                   |                    |                   |   |
|                              | Groupxtime follow-up         | -0.07 (0.73)  | -1.50, 1.36  | 0.925 | -                                                 |                     |                     |              |                                                                                   |                    |                   |   |
| Negative factor              | Baseline                     | 9.31 (0.75)   | 7.84, 10.78  |       | Baseline                                          | 9.30 (0.75)         | 7.84- 10.77         |              |                                                                                   |                    |                   |   |
|                              | Time post-intervention       | 0.11 (0.72)   | -1.53, 1.31  | 0.877 | Time post-intervention (both groups)              | -0.49 (0.54)        | -1.55- 0.57         | 0.365        |                                                                                   |                    |                   |   |
|                              | Time follow-up               | -0.07 (0.80)  | -1.63, 1.50  | 0.931 | Time follow-up (both groups)                      | -0.37 (0.59)        | -1.53- 0.79         | 0.532        | <b>Baseline, post-intervention &amp; follow-up (stable scores in both groups)</b> | <b>9.05 (0.70)</b> | <b>7.68,10.43</b> |   |
|                              | Groupxtime post-intervention | -0.80 (1.02)  | -2.79, 1.21  | 0.437 | -                                                 |                     |                     |              |                                                                                   |                    |                   |   |
|                              | Groupxtime follow-up         | -0.63 (1.13)  | -2.85, 1.58  | 0.576 | -                                                 |                     |                     |              |                                                                                   |                    |                   |   |



|                                 |                              |               |              |          |                              |              |                                         |                     |                    |             |                             |
|---------------------------------|------------------------------|---------------|--------------|----------|------------------------------|--------------|-----------------------------------------|---------------------|--------------------|-------------|-----------------------------|
| VO <sub>2max</sub> <sup>†</sup> | Baseline                     | 29.74 (1.18)  | 27.42,32.05  | Baseline | 29.74 (1.17)                 | 27.45,32.03  | <b>Baseline &amp; post-intervention</b> | <b>29.91 (1.16)</b> | <b>27.64,32.19</b> |             |                             |
|                                 | Time post-intervention       | -0.32 (0.70)  | -1.69, 1.06  | 0.652    |                              |              |                                         |                     |                    |             |                             |
|                                 | Time follow-up               | 0.54 (0.80)   | -1.03, 2.12  | 0.501    |                              |              |                                         |                     |                    |             |                             |
|                                 | Groupxtime post-intervention | 1.22 (1.02)   | -0.79, 3.22  | 0.233    | Groupxtime post-intervention | 0.90 (0.76)  |                                         |                     |                    | -0.59, 2.39 | 0.235                       |
|                                 | Groupxtime follow-up         | -2.50 (-1.13) | -4.72, -0.27 | 0.028    | Groupxtime follow-up         | -1.96 (0.82) |                                         |                     |                    | -3.55,-0.36 | 0.016                       |
|                                 |                              |               |              |          |                              |              |                                         |                     |                    |             | <b>Groupxtime follow-up</b> |

Note. Estimate= Estimated coefficient. SE= Standard error. Baseline was accepted as equal for both groups .Time (baseline=0, post-intervention=1, follow-up=2). Group (AVG=0/ HIIT=1). Group x time post-intervention (time=1, group=HIIT), group x time follow-up (time=2/ group=HIIT)

Non-significant variables were taken out of the model, and the models were compared by using Likelihood ratio test or AIC as suited, until reaching the best fit model for each variable.

Overall symptoms (total PANSS): Model 1 vs model 2, likelihood ratio test  $p=0.98$

<sup>†</sup>Five factor model of PANSS (Wallwork)

Positive factor: Model 1 vs model 2 likelihood ratio test  $p=0.56$

Negative factor: Model 1 vs model 2 likelihood ratio test  $p=0.72$ , model 2 vs model 3 likelihood ratio test  $p=0.65$

Disorganized factor: Model 1 vs model 2 likelihood ratio test  $p=0.80$ , model 2 vs model 3 likelihood ratio test  $p=0.85$

Expressed factor: Model 1 vs model 2 likelihood ratio test  $p=0.38$ , model 2 vs model 3 likelihood ratio test  $p=0.15$

Depressed factor: Model 1 vs model 2 likelihood ratio test  $p=0.86$ , model 2 AIC=940 vs model 3 AIC=938.

<sup>‡</sup> post-intervention and follow up were merged into a single time point (time after baseline) as no changes were detected in either group between these two time points

<sup>§</sup>CDSS: Calgary Depressive Scale for Schizophrenia

<sup>†</sup>VO<sub>2max</sub>: Maximum oxygen uptake
